# Supplementary material
Source: HighWire-hosted journal article supplement (https://cmaj.ca/highwire/filestream/58230/field_highwire_adjunct_files/0/flufactsheet--f.pdf)
Supplement: flufactsheet--f.pdf [file flufactsheet--f.pdf]

## FICHE D'INFORMATION DU JAMC SUR LA SANTÉ PUBLIQUE

## La grippe et le vaccin contre la grippe

**Qu'est-ce que la grippe et quels en sont les symptômes?**

L'influenza (la grippe) est une infection causée par le virus de la grippe qui infecte le nez et la gorge et peut parfois se propager aux poumons. La grippe cause habituellement une fièvre aiguë, de la toux, des frissons, de la fatigue, des douleurs corporelles et, chez les jeunes enfants, des maux d'oreille. Les gens qui ont la grippe sont souvent trop malades pour aller travailler, à l'école ou à la garderie. Contrairement aux virus à l'origine du rhume ordinaire, celui de la grippe peut causer des maladies graves comme la pneumonie, particulièrement chez les personnes très jeunes ou très âgées, ou qui ont des problèmes comme le cancer, une cardiopathie, l'asthme et le diabète. Au Canada, la grippe fait plus de 4000 victimes par année.

**Quand a lieu la «saison de la grippe» au Canada?**

La grippe fait son apparition chaque année au cours de l'hiver (de janvier à mars). Lorsque la grippe frappe une communauté, on constate une hausse marquée du nombre de consultations de médecins, d'admissions à l'hôpital et d'éclotions de maladies respiratoires dans les établissements de soins de longue durée. Beaucoup d'enfants manquent l'école et beaucoup de personnes s'absentent du travail à cause de la grippe. Les types particuliers de virus de la grippe changent un peu chaque année.

**Comment la grippe se propage-t-elle?**

Les personnes infectées propagent la grippe en toussant, en éternuant ou en touchant des objets après avoir toussé ou éternué. La toux et l'éternuement propulsent le virus de la grippe sous forme de minuscules gouttelettes qui peuvent parcourir jusqu'à un mètre (3 pieds) et atterrir sur des personnes ou des objets proches. Pour freiner la propagation de la grippe, il faut «couvrir votre toux». Couvrez-vous la bouche et le nez avec du papier mouchoir ou avec votre manche — il ne faut pas vous tousser dans les mains. Jetez le papier utilisé dans une poubelle et nettoyez-vous les mains à l'eau et au savon ou à l'aide d'un désinfectant à mains à base d'alcool. Les adultes qui ont la grippe peuvent propager le virus à compter d'un

jour avant l'apparition de leurs symptômes et jusqu'à 7 jours après. Les enfants peuvent être infectieux pendant plus de 7 jours, particulièrement si leurs symptômes persistent.

**Comment prévenir l'infection par la grippe?**

Il y a quelques moyens seulement de réduire le risque d'avoir la grippe. Le vaccin contre la grippe combiné au lavage fréquent des mains chaque jour pendant la saison de la grippe peut prévenir la plupart des infections. Au cours d'une éclosion de grippe, on utilise parfois des médicaments comme l'oseltamivir afin d'éviter que la grippe se propage aux patients à risque élevé (p. ex., ceux qui se trouvent dans un établissement de soins de longue durée).

**Qu'est-ce que le vaccin contre la grippe?**

Le vaccin contre la grippe est constitué de particules de virus de la grippe inactif (c'est-à-dire mort). Le vaccin ne cause PAS la grippe parce qu'il ne contient pas de virus vivant. Le virus de la grippe utilisé dans le vaccin est cultivé dans des œufs et c'est pourquoi les personnes allergiques aux œufs ne peuvent se faire vacciner contre la grippe.

**Pourquoi faut-il se faire vacciner contre la grippe chaque année?****Pendant combien de temps le vaccin me protège-t-il?**

Comme le virus de la grippe change chaque année, il faut mettre au point de nouveaux vaccins tous les ans. Le vaccin contre la grippe protège pendant moins d'un an et seulement contre les types de virus de la grippe qu'il contient. Pour optimiser la protection, il faut se faire vacciner contre la grippe chaque année.

**Le vaccin contre la grippe prévient-il la maladie?**

L'efficacité du vaccin contre la grippe dépend du lien entre le virus contenu dans le vaccin et le type de virus de la grippe qui se propage dans la communauté. Si les types de virus sont bien apparentés, le vaccin prévient la maladie chez 70 % à 90 % des gens. Cependant, même lorsque les types de virus ne sont pas bien apparentés, le vaccin réduit quand même le nombre de maladies graves. Le vaccin contre la

grippe ne fonctionne pas s'il est administré après l'apparition des symptômes. Pour optimiser les résultats, il faut l'administrer avant l'arrivée de la grippe dans la communauté.

**Quels sont les effets secondaires du vaccin contre la grippe?**

La plupart des gens n'ont pas d'effets secondaires, sauf un peu mal au bras au point d'injection pendant 1 ou 2 jours. Une faible fièvre ou des douleurs musculaires peuvent faire leur apparition à l'occasion — mais ce n'est pas la grippe. Ces signes indiquent que vous êtes en train de vous bâtir une solide défense contre les types de virus de la grippe contenus dans le vaccin. Les effets secondaires comme l'urticaire sont très rares à moins que la personne vaccinée soit allergique aux œufs. L'apparition du syndrome de Guillain-Barré, un trouble nerveux, après une vaccination contre la grippe est très rare (environ 1 personne sur 1 000 000 de sujets vaccinés).

**Qui devrait se faire vacciner?**

On exhorte fortement les personnes à risque de complication grave de la grippe et celles qui les traitent (p. ex., dans le système de santé ou à domicile) à se faire vacciner contre la grippe. Ce groupe comprend les personnes de 65 ans ou plus, les enfants de 6 à 23 mois, les personnes atteintes de certains problèmes de santé chroniques (p. ex., cardiopathie, asthme, fibrose kystique, diabète, cancer, néphropathie et anémie), les personnes de tous les âges qui vivent dans un établissement de soins de longue durée et les femmes enceintes. Les personnes qui s'occupent de personnes atteintes des problèmes de santé indiqués ci-dessus devraient aussi se faire vacciner contre la grippe afin d'éviter de la propager. Le vaccin est aussi bénéfique pour les personnes en santé de 2 à 64 ans.

**Noni MacDonald MD MSc**

Rédactrice de section, Santé publique, JAMC

**Erica Weir MD MSc**

Rédactrice associée, JAMC

**Joanne M. Langley MD**

Division des maladies infectieuses  
Département de pédiatrie  
Université Dalhousie  
Halifax (N.-É.)

**Intérêts concurrent :** Aucun Déclaré.
